# Supplementary material for: Synthesis of acetic acid from CO2, CH3I and H2 using a water-soluble electron storage catalyst
Source: Royal Society of Chemistry journal article supplement (doi:10.1039/d1cc01611c), 2021-01-01
Supplement: d1cc01611c1.pdf [file d1cc01611c1.pdf]

Supplementary Information for

**Acetic Acid from CO<sub>2</sub>, CH<sub>3</sub>I and H<sub>2</sub>**  
**by Means of a Water-Soluble Electron Storage Catalyst**

Takeshi Yatabe, Kazuki Kamitakahara, Kaede Higashijima, Tatsuya Ando,  
Takahiro Matsumoto, Ki-Seok Yoon, Takao Enomoto and Seiji Ogo

\*To whom correspondence should be addressed.

E-mail: ogo.seiji.872@m.kyushu-u.ac.jp

**This PDF file includes:**

Materials and Methods

Figs. S1 to S11

Table S1

References

## A Table of Contents

|                       |         |
|-----------------------|---------|
| Materials and Methods | page 1  |
| Table S1              | page 5  |
| Fig. S1               | page 6  |
| Fig. S2               | page 7  |
| Fig. S3               | page 8  |
| Fig. S4               | page 9  |
| Fig. S5               | page 10 |
| Fig. S6               | page 11 |
| Fig. S7               | page 12 |
| Fig. S8               | page 13 |
| Fig. S9               | page 14 |
| Fig. S10              | page 15 |
| Fig. S11              | page 16 |
| References            | page 17 |

## Experimental Section

**Materials and Methods.** All experiments were carried out under an N<sub>2</sub> atmosphere using standard Schlenk techniques and a glovebox. Acetonitrile was distilled over CaH<sub>2</sub> under an N<sub>2</sub> atmosphere. Methanol was distilled over Mg/I<sub>2</sub> prior to use. H<sub>2</sub> (99.9999%) and CO<sub>2</sub> (99.99%) were purchased from Sumitomo Seika Chemical Co., Ltd., ultra-pure water, CH<sub>3</sub>I and KPF<sub>6</sub> were purchased from FUJIFILM Wako Pure Chemical Corporation, NaCF<sub>3</sub>SO<sub>3</sub> was purchased from Tokyo Chemical Industry Co and DMSO-*d*<sub>6</sub> and <sup>13</sup>CH<sub>3</sub>I were purchased from Cambridge Isotope Laboratories, Inc. These reagents were used without further purification. 2,2':6',2'':6'',2'''-quaterpyridine (qpy) was prepared by the method described in the literature.<sup>1</sup>

Electrospray ionization-mass spectrometry (ESI-MS) data were obtained by a JEOL JMS-T100LC AccuTOF. Proton nuclear magnetic resonance (<sup>1</sup>H NMR) spectra were recorded on a Bruker Avance III 600 FT-NMR spectrometer. Chemical shifts in DMSO-*d*<sub>6</sub> were referenced to tetramethylsilane (TMS) for <sup>1</sup>H NMR. Ultraviolet-visible-near-infrared (UV-vis-NIR) spectra were recorded on a JASCO V-670 UV-visible-NIR spectrophotometer. Gas chromatography mass spectrometry (GC-MS) data were recorded on an Agilent 7890B GC coupled to a 5977B MSD. High performance liquid chromatography (HPLC) was performed by using an Agilent 1260 HPLC infinity system equipped with a reverse phase C18 column (TSK-GEL ODS-100 V 4.6 mm x 250 mm, particle size 5 mm). Gas chromatography (GC) analyses were conducted using a Shimadzu GC-2014 (Ar carrier) instrument with an activated charcoal column equipped with a thermal conductivity detector. X-ray photoelectron spectroscopy (XPS) was performed by using an ULVAC PHI 5000 VersaProbe II system with an Al anode X-ray source. The binding energies were corrected by assuming the C 1s binding energy of the carbon atoms of the ligand to be 284.5 eV.<sup>2</sup> Elemental analysis were performed using a Yanaco CHN-coder MT-5.

**[Rh<sup>III</sup>(qpy)Cl<sub>2</sub>](Cl) {[1](Cl)}.** An ethanol solution (20 mL) of Rh<sup>III</sup>Cl<sub>3</sub> (67 mg, 0.32 mmol) and qpy (100 mg, 0.32 mmol) was refluxed for 5 h. After the resulting solution was cooled to room temperature, light-brown solid was collected by filtration, washed by diethyl ether and dried in vacuo {yield: 62% based on Rh<sup>III</sup>Cl<sub>3</sub>}. <sup>1</sup>H NMR (600 MHz, in DMSO-*d*<sub>6</sub>, referenced to TMS): δ 8.09 (t, 2H, C-H), 8.54 (t, 2H, C-H), 8.70 (t, 2H, C-H), 8.90 (d, 2H, C-H), 8.94 (dd, 4H, C-H), 9.66 (d, 2H, C-H). ESI-MS (in methanol): *m/z*

483.1 {[1]<sup>+</sup>, relative intensity(*I*) = 100% in the range of *m/z* 200 to 2000}. Anal. Calcd for 1·3.5H<sub>2</sub>O: C<sub>20</sub>H<sub>21</sub>Cl<sub>3</sub>N<sub>4</sub>O<sub>3.5</sub>Rh: C, 41.23; H, 3.63; N, 9.62%. Found: C, 41.26; H, 3.38; N, 9.61%.

**[Rh<sup>I</sup>(ppy)](CF<sub>3</sub>SO<sub>3</sub>) {[2](CF<sub>3</sub>SO<sub>3</sub>)}**. An aqueous suspension (pH 2.0–10, 6 mL) of [1](Cl) (20 mg, 38.5 μmol) was stirred under an H<sub>2</sub> atmosphere (0.1–0.6 MPa) for 12 h at room temperature to form [2](Cl). Aqueous solution of NaCF<sub>3</sub>SO<sub>3</sub> (9.9 mg, 57.5 μmol) was added to the resulting solution. The black solid was collected by filtration, washed by water and dried in vacuo {yield: 72% based on 1}. ESI-MS (in methanol): *m/z* 413.0 {[2]<sup>+</sup>, *I* = 100% in the range of *m/z* 200 to 2000}. Anal. Calcd for [2](CF<sub>3</sub>SO<sub>3</sub>) + 0.2NaCF<sub>3</sub>SO<sub>3</sub>: C<sub>21.2</sub>H<sub>14</sub>F<sub>3.6</sub>N<sub>4</sub>Na<sub>0.2</sub>O<sub>3.6</sub>RhS<sub>1.2</sub>: C, 42.67; H, 2.36; N, 9.39%. Found: C, 42.56; H, 2.40; N, 9.35%.

**[Rh<sup>III</sup>(ppy)(CH<sub>3</sub>)I](I) {[3](I)}**. Under dark conditions, CH<sub>3</sub>I (12 μL, 193 μmol) was added to an aqueous solution of [2](Cl) (6.4 mM, 3 mL) at pH 2.0–10. The resulting mixture was stirred for 6 h to form yellow particulates, which were collected by filtration, washed with small amount of water and dried in vacuo. The yellow powder was dissolved to acetonitrile/DMF (1/4), and insoluble materials were removed by filtration. Recrystallisation was conducted by the slow vapor diffusion of diethyl ether to the filtrate. Orange crystals were collected by filtration and dried in vacuo {yield: 32% based on 2}. <sup>1</sup>H NMR (600 MHz, in DMSO-*d*<sub>6</sub>, referenced to TMS): δ 0.79 (d, 3H, Rh-CH<sub>3</sub>), 7.96 (t, 2H, C-H), 8.43 (t, 2H, C-H), 8.54 (t, 2H, C-H), 8.77–8.80 (m, 6H, C-H), 9.43 (d, 2H, C-H). ESI-MS (in methanol): *m/z* 554.9 {[3]<sup>+</sup>, *I* = 100% in the range of *m/z* 200 to 2000}. Anal. Calcd for [3](I)·0.5(CH<sub>3</sub>)<sub>2</sub>NCHO: C<sub>22.5</sub>H<sub>20.5</sub>I<sub>2</sub>N<sub>4.5</sub>O<sub>0.5</sub>Rh: C, 37.60; H, 2.88; N, 8.77%. Found: C, 37.73; H, 2.72; N, 8.53%.

**Stepwise Reaction of 3 with CO<sub>2</sub>**. An aqueous solution (1.5 mL) of [3](I) (3.0 mg, 4.39 μmol) was stirred for 12 h at 80 °C under CO<sub>2</sub> atmosphere (0.8 MPa) at pH 2.0. After cooling at room temperature, a portion (800 μL) of the resulting solution was passed through a short silica column to remove complex(es). The amount of acetic acid was quantified with HPLC. The mobile phase was H<sub>2</sub>O/CH<sub>3</sub>CN (98/2) with phosphoric acid (0.1v/v%) and a flow rate was 1.0 mL min<sup>-1</sup>. The yield of acetic acid was determined as 12 % based on [3](I).

**Catalytic Production of Acetic Acid.** A H<sub>2</sub>O/CH<sub>3</sub>OH (1/1) solution (3.9 mL) of [1](Cl) (1.0 mg, 1.92 μmol) and CH<sub>3</sub>I (6.7 μL, 108 μmol) was stirred for 24 h at 80 °C

under an H<sub>2</sub> (0.15 MPa) and CO<sub>2</sub> (0.8 MPa) atmosphere in presence of LiBr (54 mg, 0.62 mmol) at pH 2.0. After cooling at room temperature, a portion (800 μL) of the resulting solution was passed through a short silica column to remove complex(es). The amount of acetic acid was quantified with HPLC. The mobile phase was H<sub>2</sub>O/CH<sub>3</sub>CN (98/2) with phosphoric acid (0.1v/v%) and a flow rate was 1.0 mL min<sup>-1</sup>. Turnover number of acetic acid production was determined as 1 by HPLC (TON = mol of acetic acid/mol of **1**). No catalytic production of acetic acid was occurred without **1**, H<sub>2</sub>, CO<sub>2</sub> or CH<sub>3</sub>I, which was confirmed by HPLC as blank experiment.

**Qualitative Analysis of Acetic Acid by GC-MS.** A H<sub>2</sub>O/CH<sub>3</sub>OH (1/1) solution (3.9 mL) of [**1**](Cl) (1.0 mg, 1.92 μmol) and CH<sub>3</sub>I (6.7 μL, 108 μmol) was stirred for 24 h at 80 °C under an H<sub>2</sub> (0.15 MPa) and CO<sub>2</sub> (0.8 MPa) atmosphere in presence of LiBr (54 mg, 0.62 mmol) at pH 2.0. A portion (350 μL) of the reaction solution was added to diethyl ether (1.4 mL) and stirred for 30 min at 30 °C. The organic phase was concentrated to 500 μL, and acetic acid in the solution was detected by GC-MS.

**<sup>13</sup>C-labelled Experiment for Catalytic Reaction.** The procedure was the same as that of the above CH<sub>3</sub>I experiment except <sup>13</sup>CH<sub>3</sub>I (6.7 μL, 108 μmol) was used. The produced <sup>13</sup>CH<sub>3</sub>COOH was detected by GC-MS.

**pH Adjustment.** pH of aqueous solutions were adjusted by using 1.0 M HNO<sub>3</sub> solution. The pH values of the solutions were determined by a pH meter (IQ Scientific Instruments, Inc., IQ200) equipped with a stainless steel micro pH probe (IQ Scientific Instruments, Inc., PH15-SS).

**X-ray Crystallographic Analyses of **1**, **2** and **3**.** A single crystal of [**1**](Cl) was obtained from its ethanol solution at room temperature. A single crystal of [**2**](CF<sub>3</sub>SO<sub>3</sub>) was obtained from the DMF solution diffused with acetone at room temperature. A single crystal of [**3**](PF<sub>6</sub>) was obtained from the acetonitrile solution of **3** diffused with diethyl ether at room temperature in presence of KPF<sub>6</sub>. Measurements were made on a Rigaku XtaLAB P200 with confocal monochromated Mo-Kα radiation (λ = 0.7107 Å). Data were collected and processed using the CrystalClear program. All calculations were performed using the CrystalStructure crystallographic software package. Crystallographic data for **1**, **2** and **3** have been deposited with the Cambridge Crystallographic Data Centre as Supplementary Publication Nos. 2054176 (**1**), 2054177 (**2**) and 2054178 (**3**). Copies of the data can be obtained free of charge on application to CCDC, 12 Union Road, Cambridge

CB2 1EZ, UK {fax: (+44)1223-336-033; e-mail: [deposit@ccdc.cam.ac.uk](mailto:deposit@ccdc.cam.ac.uk)}.

**Table S1.** Characterisation of Rh complexes **1**, **2** and **3**

|                    | <b>1</b> | <b>2</b> | <b>3</b> |
|--------------------|----------|----------|----------|
| X-ray              | Fig. 1   | Fig. 2   | Fig. 3   |
| ESI-MS             | Fig. S1  | Fig. S3  | Fig. S6  |
| <sup>1</sup> H NMR | Fig. S2  | -        | Fig. S7  |
| UV-vis             | -        | Fig. S4  | Fig. S8  |
| XPS                | Fig. S5  | Fig. S5  | -        |

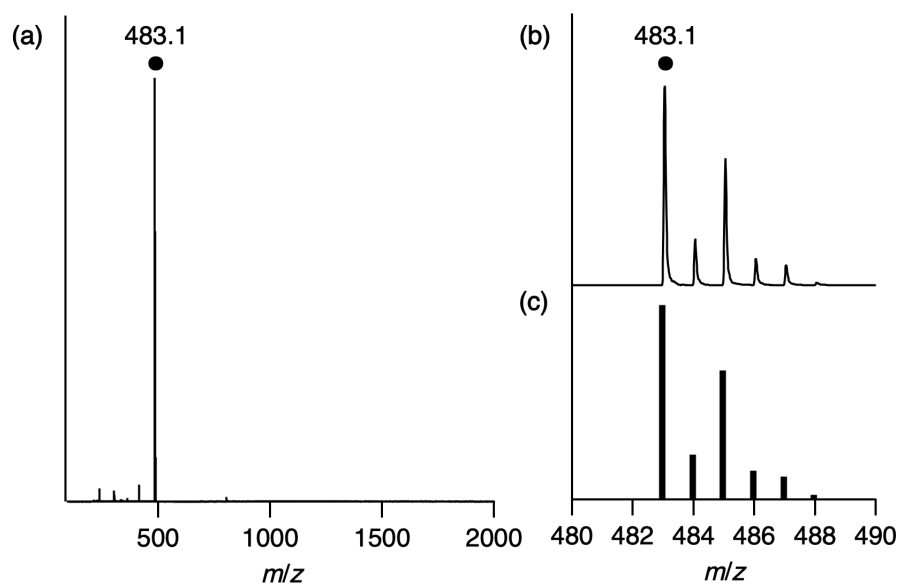

**Fig. S1** (a) A positive-ion ESI mass spectrum of [1](Cl) in methanol. The signal at  $m/z$  483.1 corresponds to [1]<sup>+</sup>. (b) The signal at  $m/z$  483.1 for [1]<sup>+</sup>. (c) The calculated isotopic distribution for [1]<sup>+</sup>.



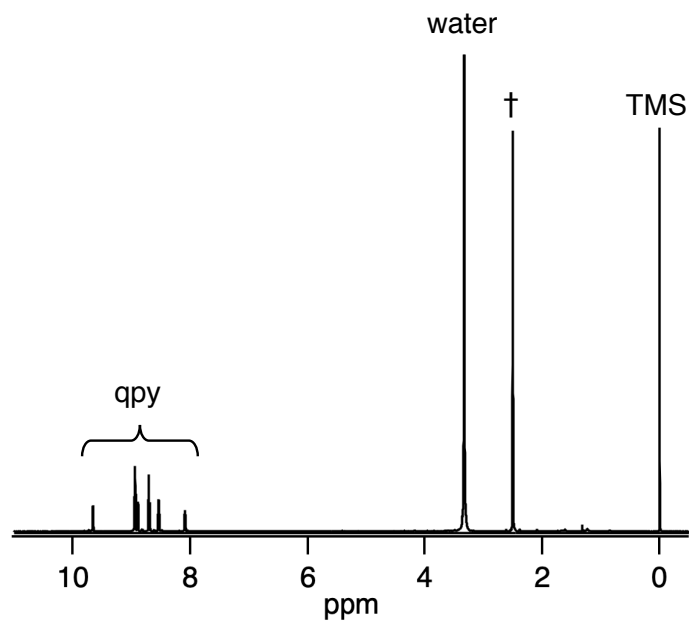

**Fig. S2** A  $^1\text{H}$  NMR spectrum of  $[\mathbf{1}](\text{Cl})$  in  $\text{DMSO-}d_6$ . Tetramethylsilane (TMS), reference with the methyl proton resonance set at 0.00 ppm. †: The signal of dimethyl sulfoxide contained in  $\text{DMSO-}d_6$ .

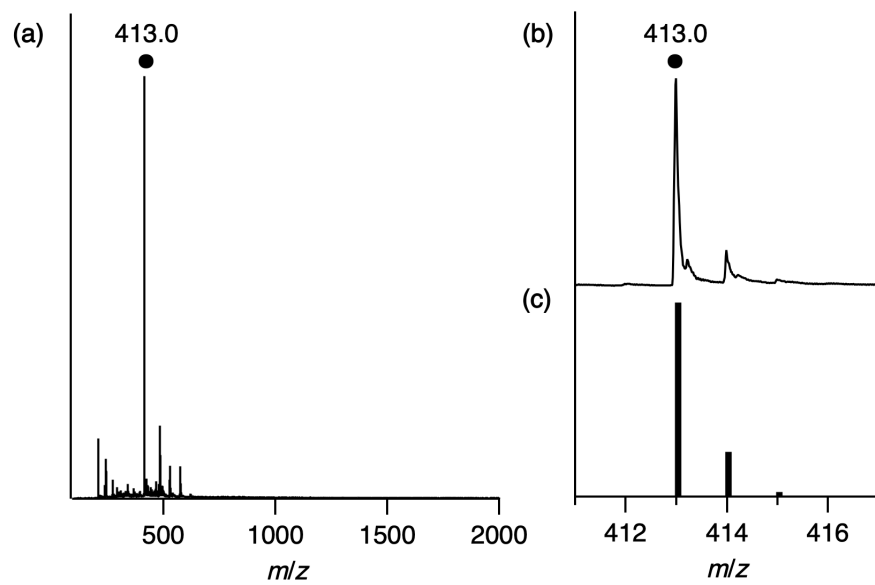

**Fig. S3** (a) A positive-ion ESI mass spectrum of [2](Cl) in methanol. The signal at  $m/z$  413.0 corresponds to [2]<sup>+</sup>. (b) The signal at  $m/z$  413.0 for [2]<sup>+</sup>. (c) The calculated isotopic distribution for [2]<sup>+</sup>.

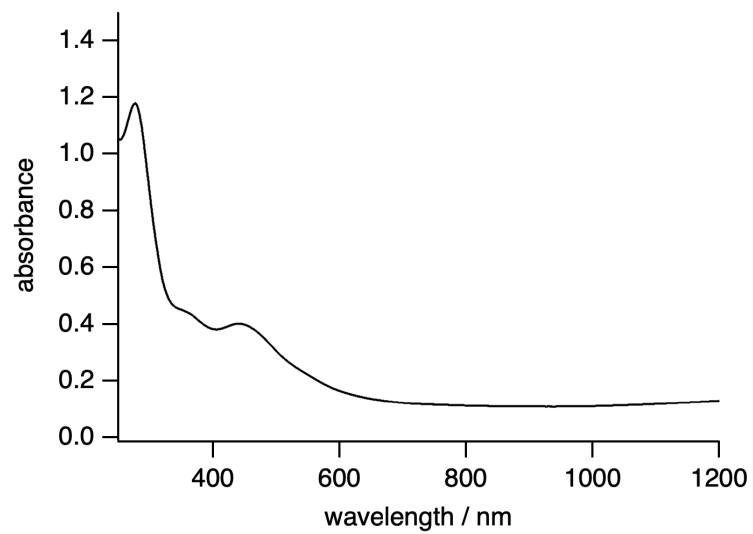

**Fig. S4** An UV-vis-NIR absorption spectrum of [2](Cl) obtained from the reaction of [1](Cl) with H<sub>2</sub> (0.6 MPa) at room temperature for 12 h in water (pH 5.5). Light pass length is 0.1 cm.

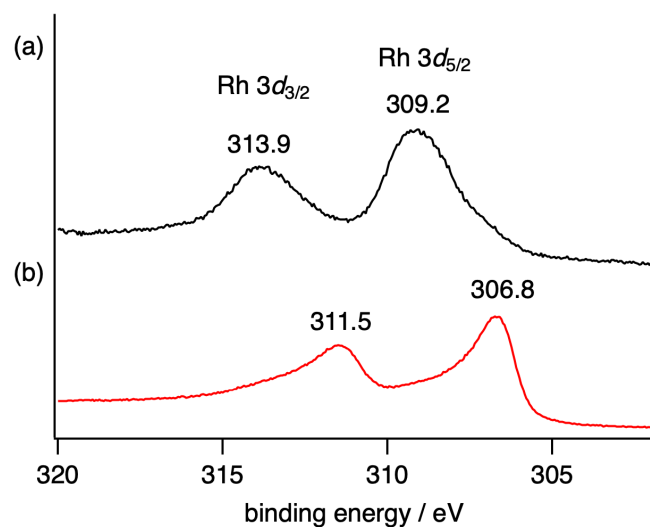

**Fig. S5** XPS spectra of the Rh 3d regions for (a) the Rh<sup>III</sup> complex **[1]**(Cl) and (b) the Rh<sup>I</sup> complex **[2]**(CF<sub>3</sub>SO<sub>3</sub>).

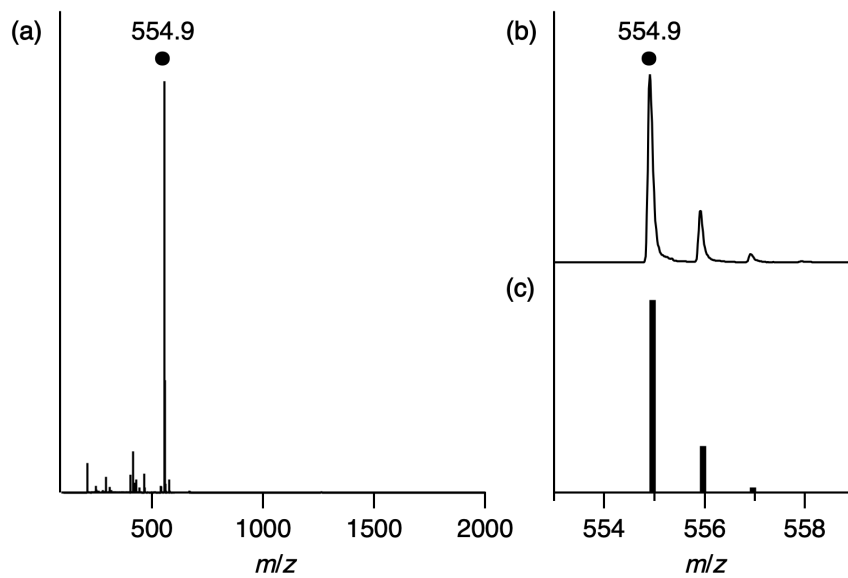

**Fig. S6** (a) A positive-ion ESI mass spectrum of [3](I) in methanol. The signal at  $m/z$  554.9 corresponds to [3]<sup>+</sup>. (b) The signal at  $m/z$  554.9 for [3]<sup>+</sup>. (c) The calculated isotopic distribution for [3]<sup>+</sup>.

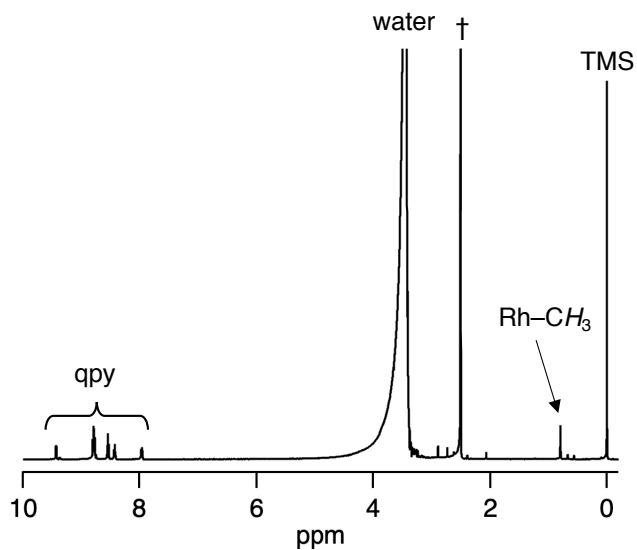

**Fig. S7** A  $^1\text{H}$  NMR spectrum of [3](I) in  $\text{DMSO-}d_6$ . Tetramethylsilane (TMS), reference with the methyl proton resonance set at 0.00 ppm. †: The signal of dimethyl sulfoxide contained in  $\text{DMSO-}d_6$ .

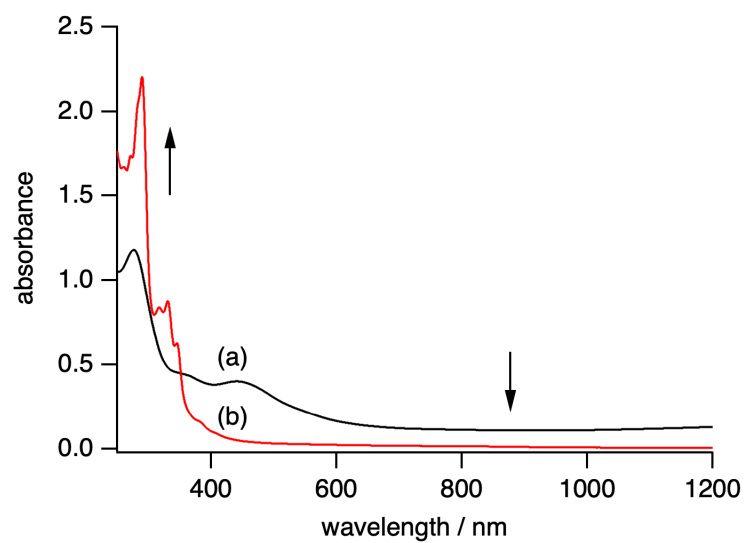

**Fig. S8** UV-vis-NIR absorption spectra of (a) aqueous solution of [2](Cl) and (b) aqueous solution 30 min after the reaction of [2](Cl) with 5 equivalents of CH<sub>3</sub>I at room temperature. Light pass length is 0.1 cm.

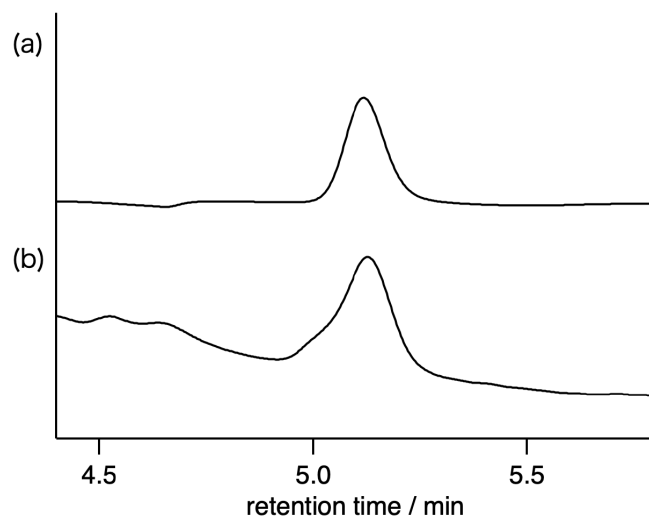

**Fig. S9** Liquid chromatograms of (a) authentic acetic acid in H<sub>2</sub>O/CH<sub>3</sub>CN (98/2) with phosphoric acid (0.1v/v%) and (b) the *in-situ* solution of [3](I) with CO<sub>2</sub> in H<sub>2</sub>O /CH<sub>3</sub>CN (98/2) with phosphoric acid (0.1v/v%).



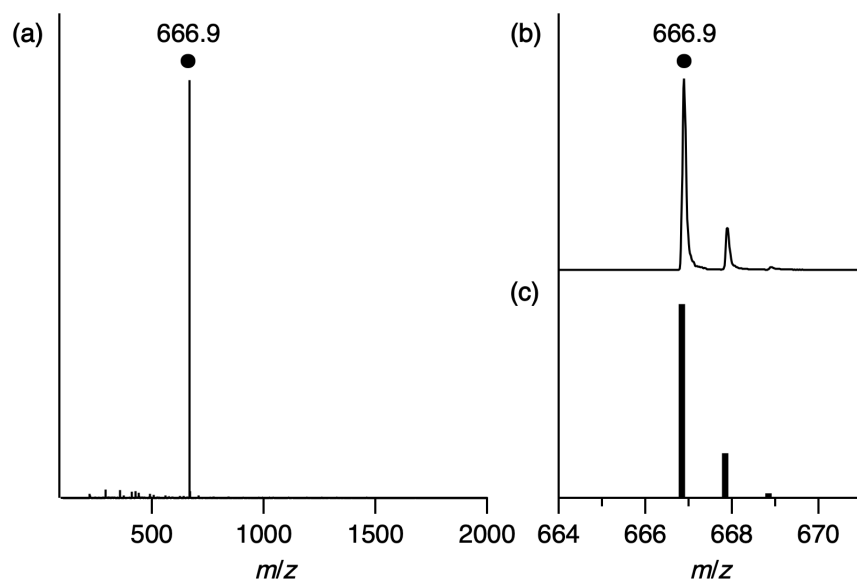

**Fig. S10** (a) A positive-ion ESI mass spectrum of **4** in methanol. The signal at  $m/z$  666.9 corresponds to  $[\mathbf{4}]^+$ . (b) The signal at  $m/z$  666.9 for  $[\mathbf{4}]^+$ . (c) The calculated isotopic distribution for  $[\mathbf{4}]^+$ .

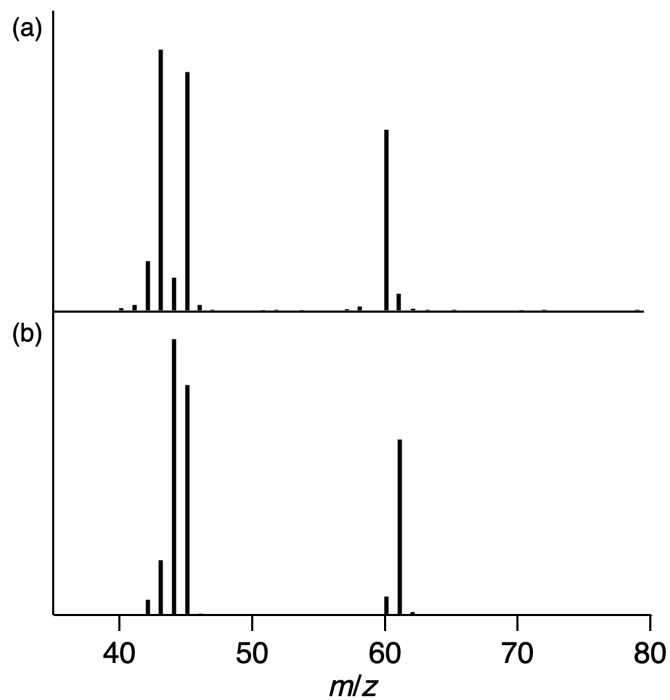

**Fig. S11** Positive-ion GC mass spectra of (a) acetic acid obtained from the catalytic reaction solution of **[1]**(Cl) and  $\text{CH}_3\text{I}$  stirring for 24 h at 80 °C under an  $\text{H}_2$  (0.15 MPa) and  $\text{CO}_2$  (0.8 MPa) atmosphere in  $\text{H}_2\text{O}/\text{CH}_3\text{OH}$  (1/1) solution in the presence of LiBr and (b)  $^{13}\text{CH}_3\text{COOH}$  obtained from the reaction of **[1]**(Cl) with  $^{13}\text{CH}_3\text{I}$  stirring for 24 h at 80 °C under an  $\text{H}_2$  (0.15 MPa) and  $\text{CO}_2$  (0.8 MPa) atmosphere in  $\text{H}_2\text{O}/\text{CH}_3\text{OH}$  (1/1) solution in the presence of LiBr. The detailed procedures are described in the experimental section.

### ***References***

- 1 W. Muramatsu, T. Hattori, H. Yamamoto, *J. Am. Chem. Soc.* 2019, **141**, 12288–12295.
- 2 J. F. Moulder, W. F. Stickle, P. E. Sobol, K. D. Bomben, In *Handbook of X-ray Photoelectron Spectroscopy*; Chastin, J., King, R. C., Jr., Eds.; Physical Electronics, Inc.: Eden Prairie, MN, 1995; pp 40– 41.
